# Supplementary material for: Nematicidal Coumarins from Cnidium monnieri Fruits and Angelica dahurica Roots and Their Physiological Effect on Pine Wood Nematode (Bursaphelenchus xylophilus)
Source: MDPI journal article supplement (doi:10.3390/molecules28104109), 2023-05-15
Supplement: s1 [file s1]

## Supplementary Materials

### Nematicidal Coumarins from *Cnidium monnieri* fruits and *Angelica dahurica* roots and their physiological effect on pine wood nematode (*Bursaphelenchus xylophilus*)

NMR spectra (Figure S1-S8) of the isolated nematocidal coumarins (Compounds **1-8**) in this research were listed as follows.

**Compound 1:** EIMS  $m/z$ : 244.2  $[M]^+$ .  $^1H$  NMR (600 MHz,  $CDCl_3$ ):  $\delta$ 7.60 (1 H, d,  $J=9.42$  Hz, H-4),  $\delta$ 7.27 (1H, d,  $J=8.58$  Hz, H-5),  $\delta$ 6.81 (1H, d,  $J=8.58$  Hz, H-6),  $\delta$ 6.23 (1H, d,  $J=9.42$  Hz, H-3),  $\delta$ 5.21 (1H, m, H-2'), 3.53 (2H, d,  $J=7.32$  Hz, H-1'),  $\delta$ 1.83 (3H, s, H-4'),  $\delta$ 1.65 (3H, s, H-5');  $^{13}C$  NMR ( $CDCl_3$ ):  $\delta$ 161.47 (C-2),  $\delta$ 160.32 (C-7),  $\delta$ 152.94 (C-9),  $\delta$ 143.81 (C-4),  $\delta$ 132.74 (C-3'),  $\delta$ 126.26 (C-5),  $\delta$ 121.21 (C-2'),  $\delta$ 119.87 (C-8),  $\delta$ 114.81 (C-10),  $\delta$ 113.13 (C-3),  $\delta$ 107.43 (C-6),  $\delta$ 56.14 ( $OCH_3$ ),  $\delta$ 25.89 (C-4'),  $\delta$ 22.02 (C-1'),  $\delta$ 18.01 (C-5').

**Compound 2:** EIMS  $m/z$ : 216.1  $[M]^+$ .  $^1H$  NMR (600 MHz,  $CDCl_3$ ):  $\delta$ 8.11 (1H, d,  $J=9.78$  Hz, H-4),  $\delta$ 8.09 (1H, d,  $J=2.22$  Hz, H-2'), 7.65 (1H, s, H-5), 7.07 (1H,  $J=2.22$  Hz, H-3'), 6.40 (1H, d,  $J=9.78$  Hz, H-3), 4.14 (3H, s,  $OCH_3$ );  $^{13}C$  NMR ( $CDCl_3$ ):  $\delta$ 160.29 (C-2),  $\delta$ 148.41 (C-7),  $\delta$ 147.50 (C-2'),  $\delta$ 145.82 (C-4),  $\delta$ 142.99 (C-9),  $\delta$ 132.42 (C-8),  $\delta$ 126.47 (C-6),  $\delta$ 116.95 (C-10),  $\delta$ 114.48 (C-3),  $\delta$ 107.62 (C-3'),  $\delta$ 61.54 (8- $OCH_3$ ).

**Compound 3:** EIMS  $m/z$ : 386.2  $[M]^+$ .  $^1H$  NMR (600 MHz,  $CDCl_3$ ):  $\delta$ 7.61 (1H, d,  $J=9.48$  Hz, 4-H),  $\delta$ 7.41 (1H, d,  $J=8.46$  Hz, 5-H),  $\delta$ 7.08 (1H, q,  $J=7.08$  Hz,  $-CH=C-CO$ ),  $\delta$ 6.81 (1H, d,  $J=8.46$  Hz, 6-H),  $\delta$ 6.21 (1H, d,  $J=9.48$  Hz, 3-H),  $\delta$ 5.28 (1H, d,  $J=6.96$  Hz, 3'-H),  $\delta$ 4.28 (1H, d,  $J=6.96$  Hz, 2'-H),  $\delta$ 2.0 (3H, s,  $CH_3-C=O$ ),  $\delta$ 1.71 (3H each, d,  $J=7.08$  Hz,  $CH_3-CH=C$ ), 1.58 (3H, s,  $CH_3-C=CH$ ),  $\delta$ 1.24, 1.18 (3H each, s,  $CH_3-C-O$ ).

**Compound 4:** EIMS  $m/z$ : 246.1  $[M]^+$ .  $^1H$  NMR (600 MHz,  $CDCl_3$ ):  $\delta$ 8.11 (1H, d,  $J=9.78$  Hz, H-4),  $\delta$ 7.61 (1H, d,  $J=2.34$  Hz, H-2'),  $\delta$ 6.99 (1H, d,  $J=2.34$  Hz, H-3'),  $\delta$ 6.28 (1H, d,  $J=9.78$  Hz, H-3),  $\delta$ 4.16, 4.15 (2H, s, 5, 8- $OCH_3$ );  $^{13}C$  NMR ( $CDCl_3$ ):  $\delta$ 160.54 (C-2),  $\delta$ 150.12 (C-7),  $\delta$ 145.22 (C-2'),  $\delta$ 144.39 (C-9),  $\delta$ 143.82 (C-5),  $\delta$ 139.46 (C-4),  $\delta$ 128.36 (C-8),  $\delta$ 114.94 (C-6),  $\delta$ 113.00 (C-3),  $\delta$ 107.78 (C-10),  $\delta$ 105.17 (C-3'),  $\delta$ 61.80 (8- $OCH_3$ ),  $\delta$ 60.94 (5- $OCH_3$ ).

**Compound 5:** EIMS  $m/z$ : 246.1  $[M]^+$ .  $^1H$  NMR (600 MHz,  $CDCl_3$ ):  $\delta$ 7.62 (1H, d,  $J=9.84$  Hz, H-4), 7.34 (1H, s, H-5), 6.81 (1H, s, H-8), 6.28 (1H, d,  $J=9.84$  Hz, H-3), 5.37 (1H, t,  $J=8.52$  Hz, H-2'), 3.93 (1H, m, H-3'), 1.34, 1.28 (3H each, s, 2 $CH_3$ ).

**Compound 6:** EIMS  $m/z$ : 270.1  $[M]^+$ .  $^1H$  NMR (600 MHz,  $CDCl_3$ ):  $\delta$ 8.15 (1H, d,  $J=9.78$  Hz, H-4),  $\delta$ 7.58 (1H, d,  $J=2.34$  Hz, H-2'),  $\delta$ 7.15 (1H, s, H-8),  $\delta$ 6.94 (1H, d,  $J=2.34$  Hz, 3'-H),  $\delta$ 6.26 (1H, d,  $J=9.78$  Hz, 3-H),  $\delta$ 5.53 (1H, t,  $J=6.96$  Hz, 3''-H),  $\delta$ 4.91 (2H, d,  $J=6.96$  Hz, 2''-H),  $\delta$ 1.79, 1.69 (3H each, s,  $=C-(CH_3)_2$ );  $^{13}C$  NMR ( $CDCl_3$ ):  $\delta$ 161.31 (C-2),  $\delta$ 158.23 (C-7),  $\delta$ 152.78 (C-9),  $\delta$ 149.06 (C-5),  $\delta$ 144.98 (C-2'),  $\delta$ 139.92 (C-3'),  $\delta$ 139.64 (C-10),  $\delta$ 119.20 (C-6),  $\delta$ 114.33 (C-3),  $\delta$ 112.69 (C-4),  $\delta$ 107.65 (C-8),  $\delta$ 105.12 (C-3''),  $\delta$ 94.35 (C-4''),  $\delta$ 69.85 (C-2''),  $\delta$ 25.89, 18.30 (2 $CH_3$ ).

**Compound 7:** EIMS  $m/z$ : 270.1  $[M]^+$ .  $^1H$  NMR (600 MHz,  $CDCl_3$ ):  $\delta$ 7.75 (1H, d,  $J=9.54$  Hz, H-4),  $\delta$ 7.68 (1H, d,  $J=2.22$  Hz, H-2'),  $\delta$ 7.34 (1H, s, H-5),  $\delta$ 6.80 (1H, d,  $J=2.22$  Hz, H-3'),  $\delta$ 6.35 (1H, d,  $J=9.54$  Hz, H-3),  $\delta$ 5.60

(1H, t, J=7.20 Hz, H-3''),  $\delta$ 5.00 (2H, d, J=7.20 Hz, H-2''),  $\delta$ 1.73, 1.71 (3H each, s, =C-(CH<sub>3</sub>)<sub>2</sub>); <sup>13</sup>C NMR (CDCl<sub>3</sub>):  $\delta$ 160.60 (C-2),  $\delta$ 148.73 (C-7),  $\delta$ 146.70 (C-9),  $\delta$ 144.41 (C-5),  $\delta$ 143.94 (C-2'),  $\delta$ 139.83 (C-3'),  $\delta$ 131.79 (C-8),  $\delta$ 125.94 (C-6),  $\delta$ 119.87 (C-3),  $\delta$ 116.59 (C-4),  $\delta$ 114.81 (C-10),  $\delta$ 113.22 (C-3''),  $\delta$ 106.79 (C-4''),  $\delta$ 70.26 (C-2''),  $\delta$ 25.90, 18.20 (2CH<sub>3</sub>).

Compound **8**: EIMS m/z: 216.1 [M]<sup>+</sup>. <sup>1</sup>H NMR (600 MHz, CDCl<sub>3</sub>):  $\delta$ 8.14 (1H, d, J=9.78 Hz, H-4),  $\delta$ 7.58 (1H, d, J=2.34 Hz, H-2'),  $\delta$ 7.12 (1H, s, H-8),  $\delta$ 7.00 (1H, d, J=2.34 Hz, H-3'),  $\delta$ 6.26 (1H, d, J=9.78 Hz, H-3),  $\delta$ 4.26 (3H, s, 5-OCH<sub>3</sub>); <sup>13</sup>C NMR (CDCl<sub>3</sub>):  $\delta$ 161.29 (C-2),  $\delta$ 158.48 (C-7),  $\delta$ 152.83 (C-9),  $\delta$ 149.68 (C-5),  $\delta$ 144.88 (C-2'),  $\delta$ 139.32 (C-4),  $\delta$ 112.80 (C-6),  $\delta$ 112.68 (C-3),  $\delta$ 106.54 (C-10),  $\delta$ 105.11 (C-3'),  $\delta$ 93.97 (C-8),  $\delta$ 60.19 (5-OCH<sub>3</sub>).

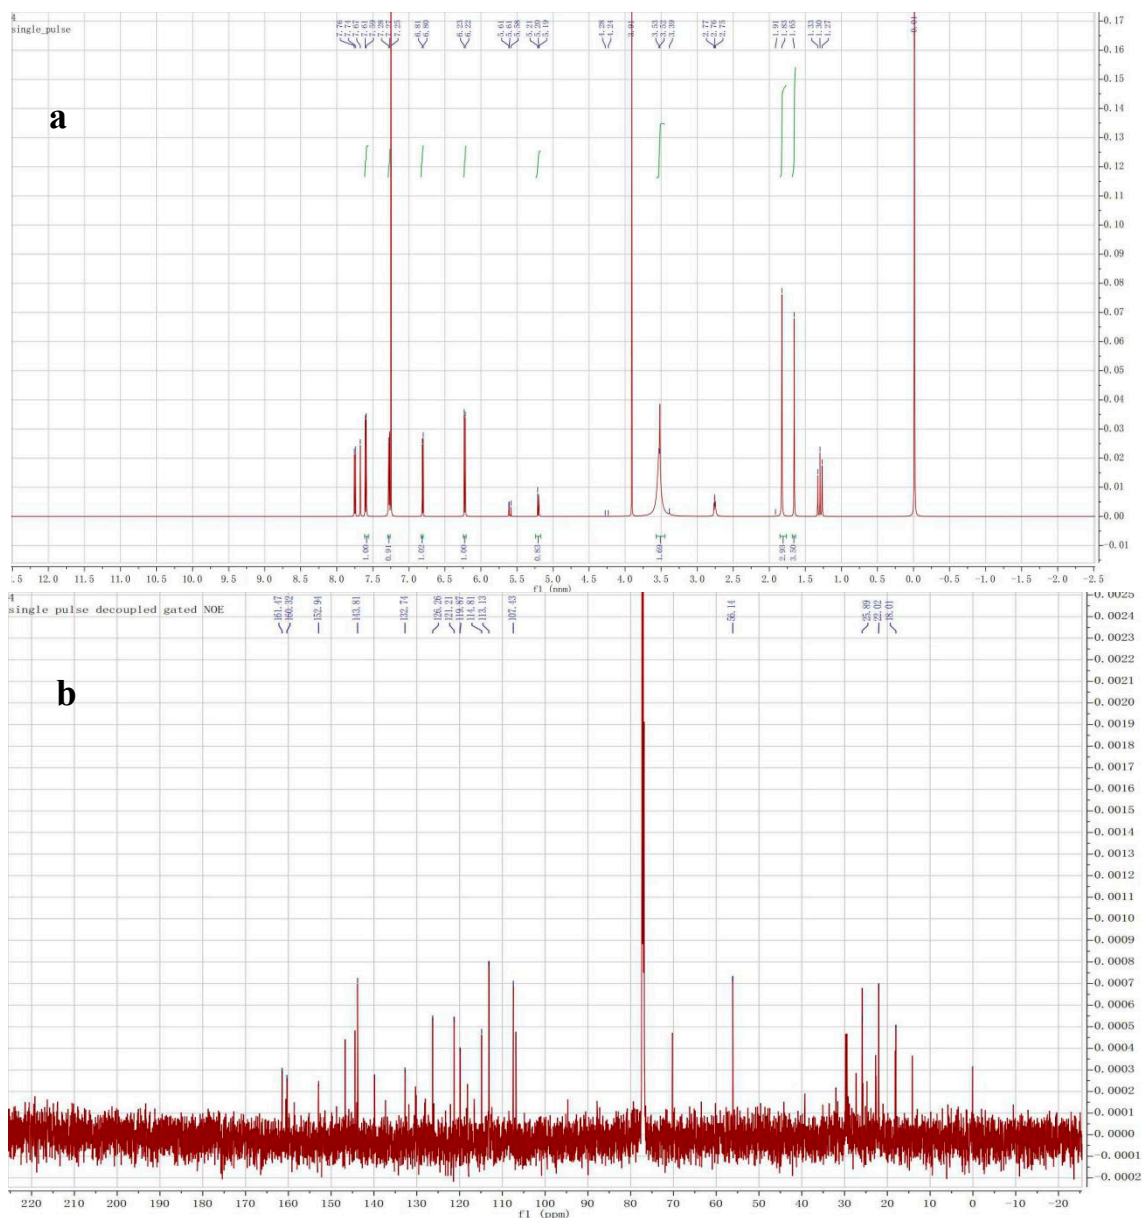

**Figure S1** <sup>1</sup>H NMR (a) and <sup>13</sup>C NMR (b) spectra of the coumarin **1** (osthol)

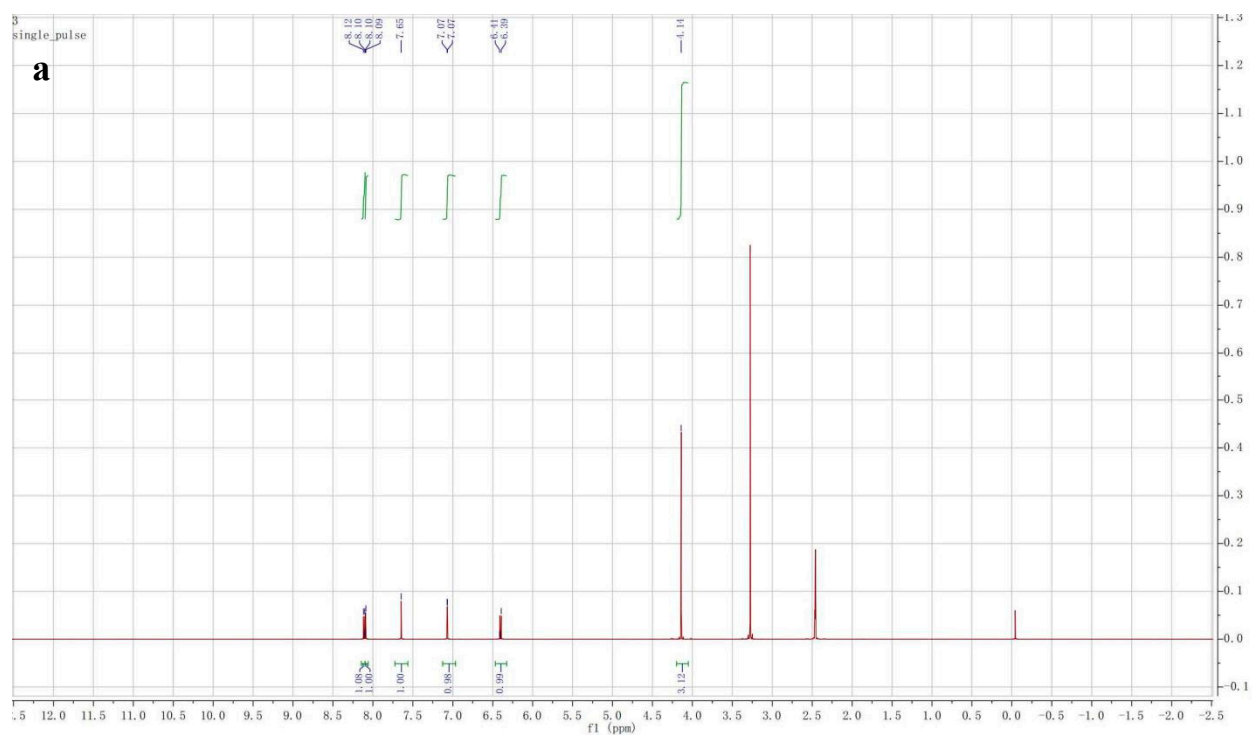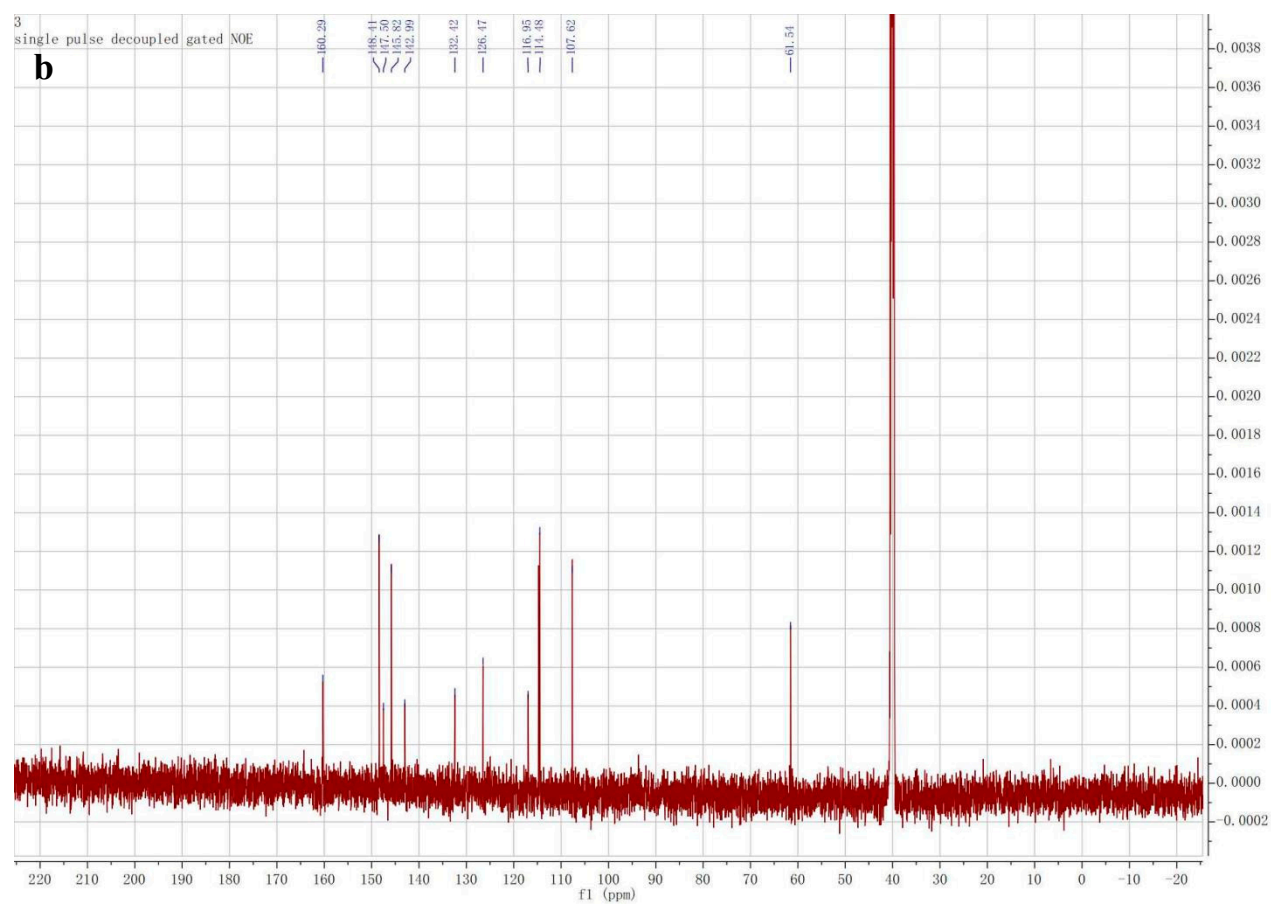

**Figure S2**  $^1\text{H}$  NMR (a) and  $^{13}\text{C}$  NMR (b) spectra of the coumarin **2** (xanthotoxin)

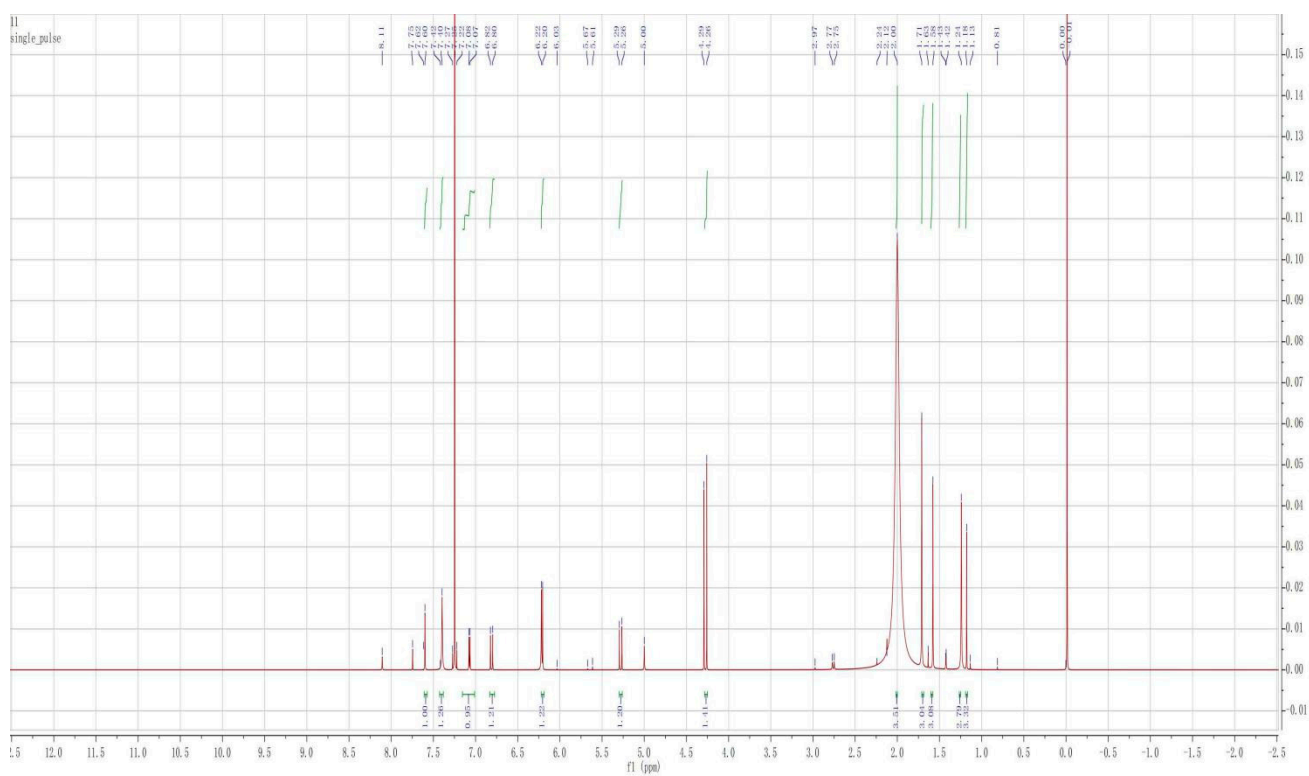

**Figure S3** <sup>1</sup>H NMR spectrum of the coumarin **3** (cindimine)

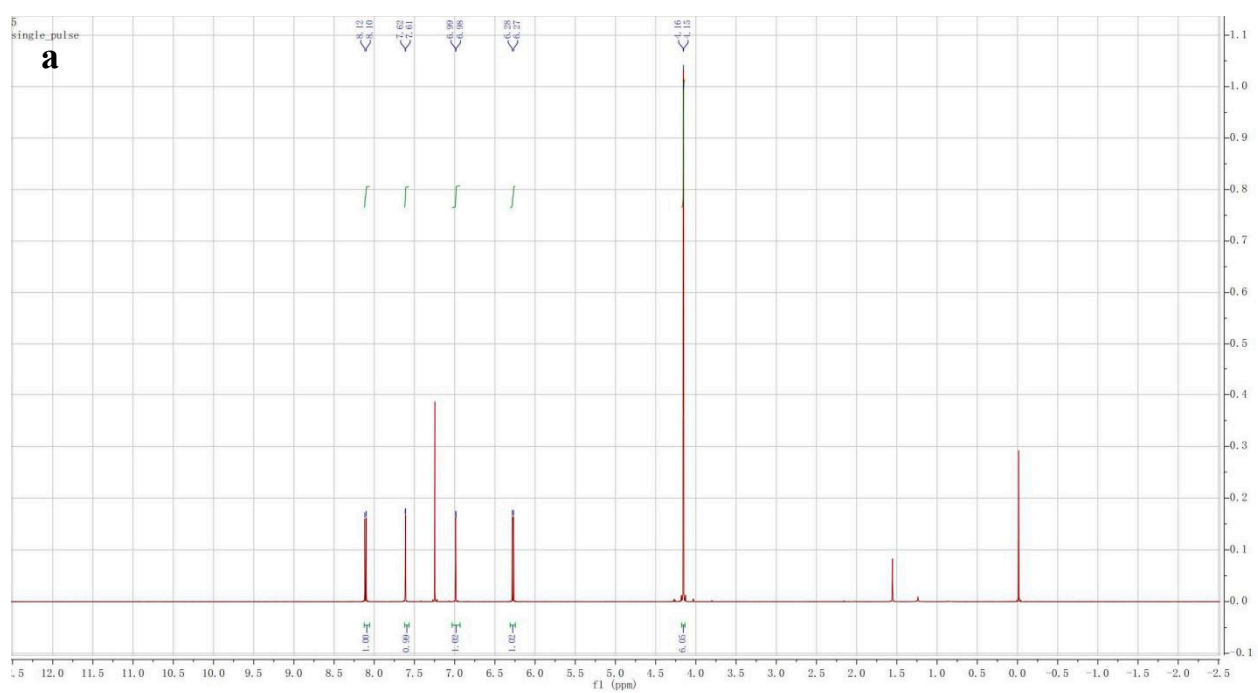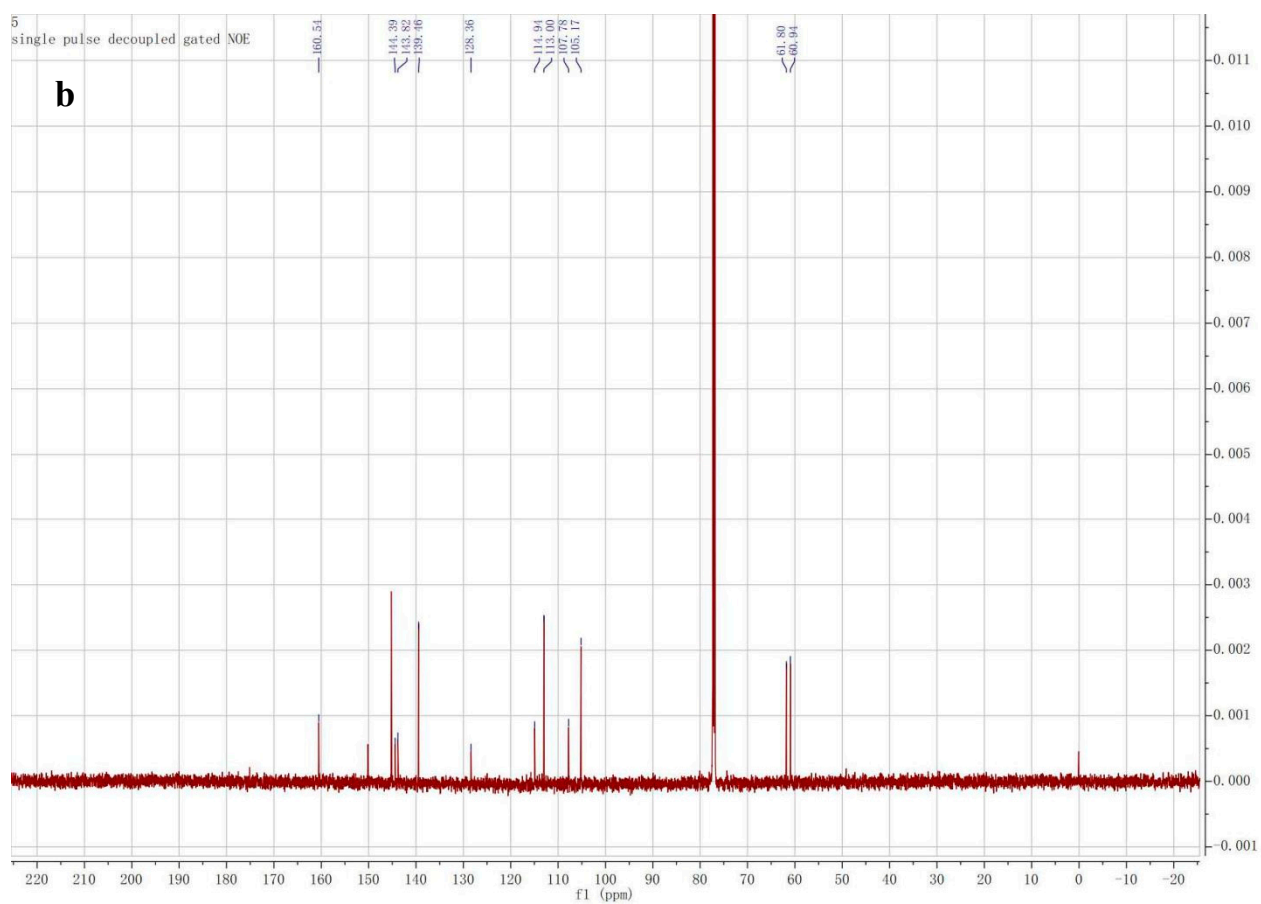

**Figure S4**  $^1\text{H}$  NMR (**a**) and  $^{13}\text{C}$  NMR (**b**) spectra of the coumarin **4** (isopimpinellin)

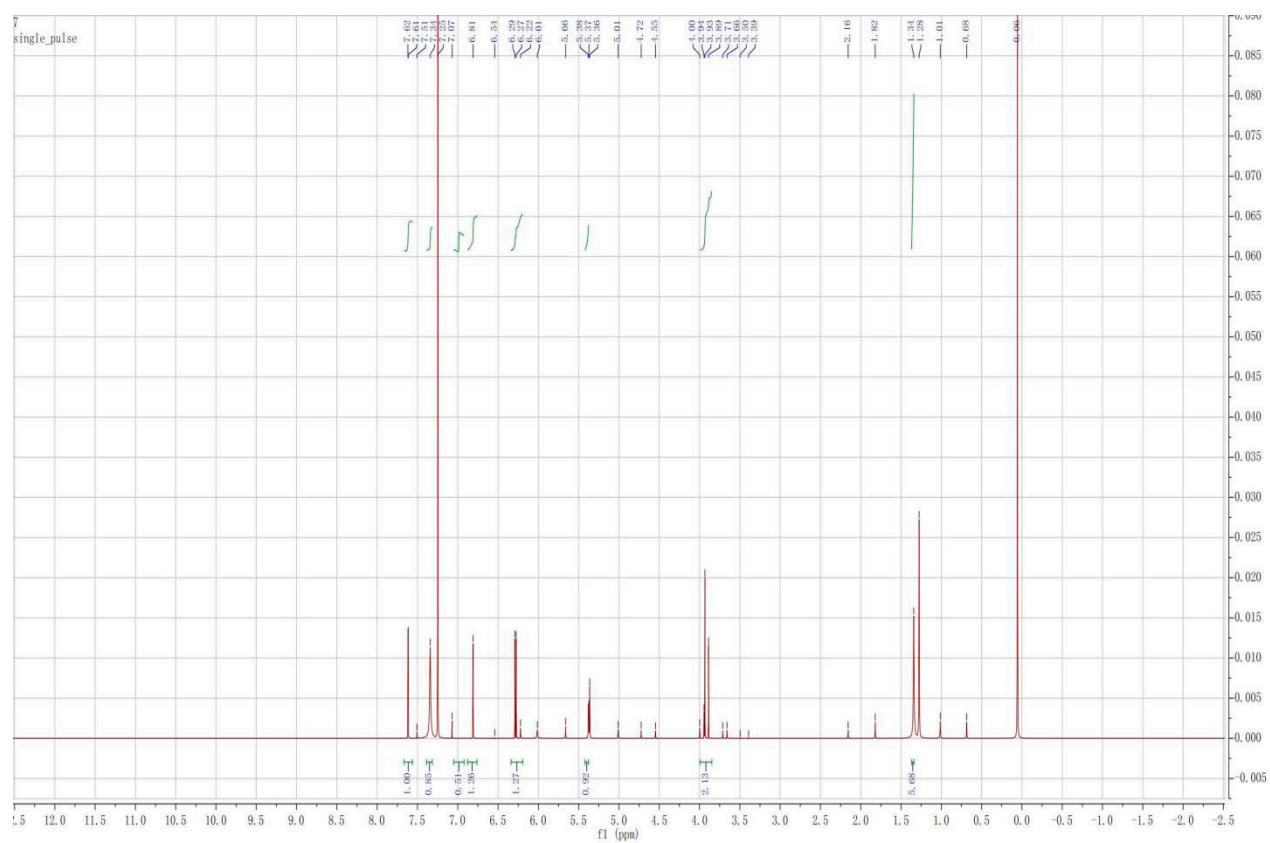

**Figure S5**  $^1\text{H}$  NMR spectrum of the coumarin **5** (marmesin)

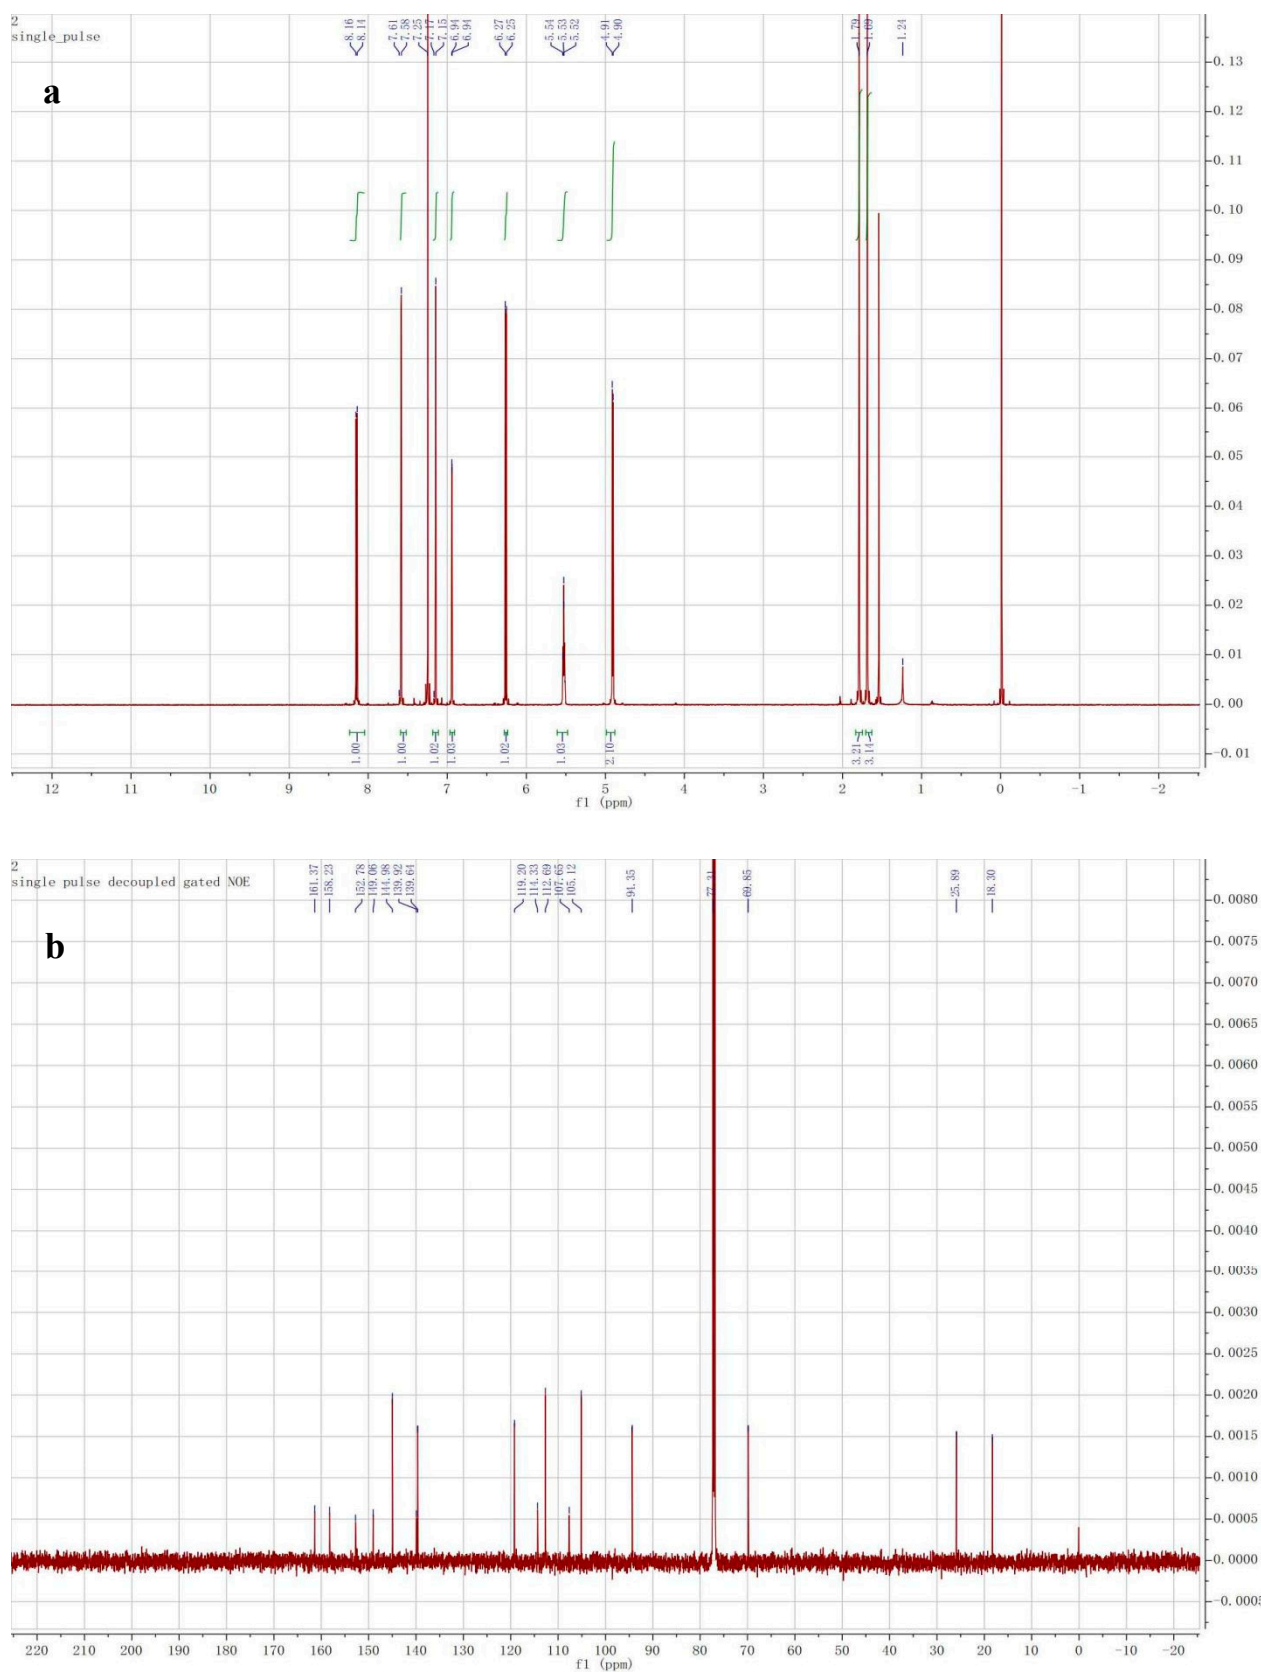

**Figure S6**  $^1\text{H}$  NMR (**a**) and  $^{13}\text{C}$  NMR (**b**) spectra of the coumarin **6** (isoimperatorin)

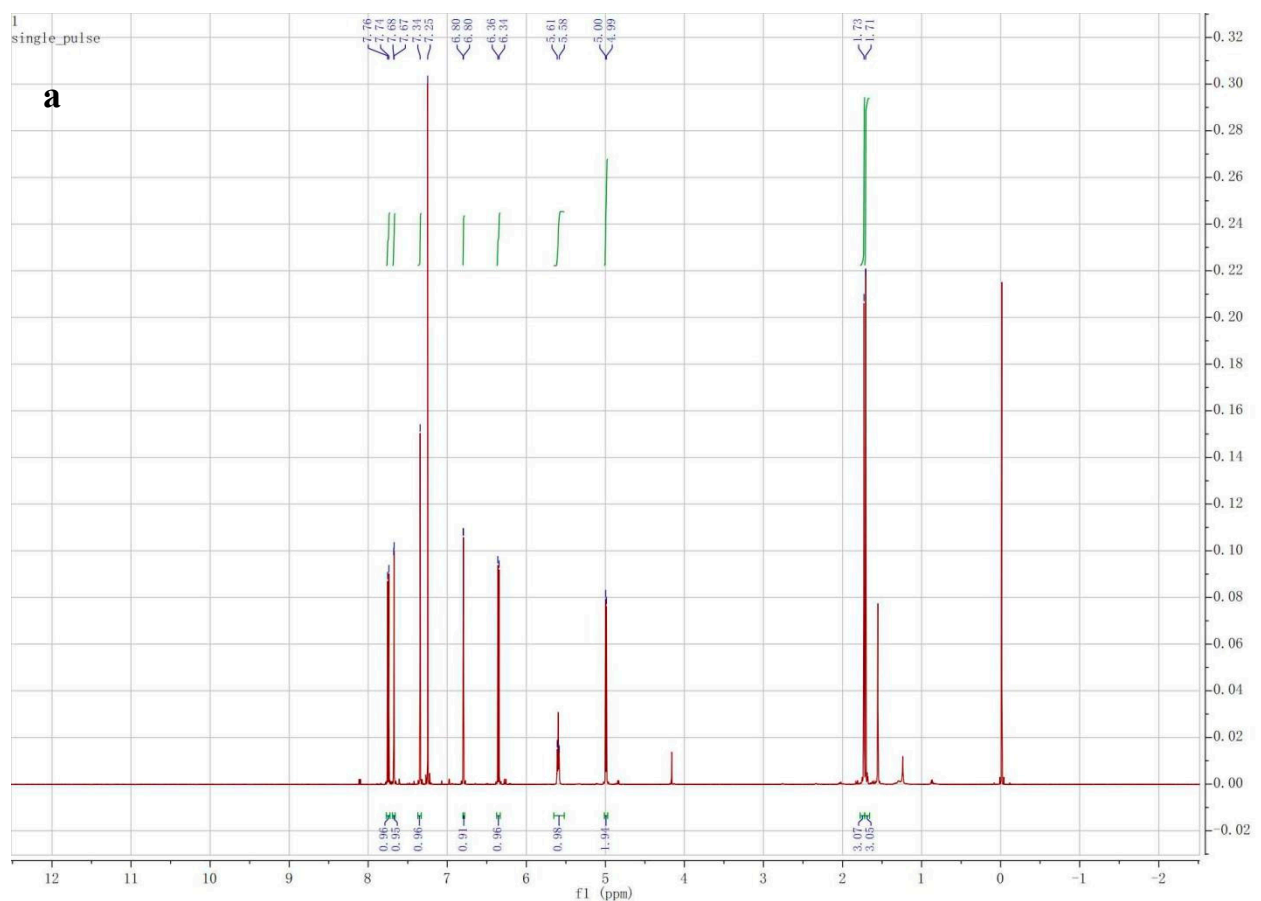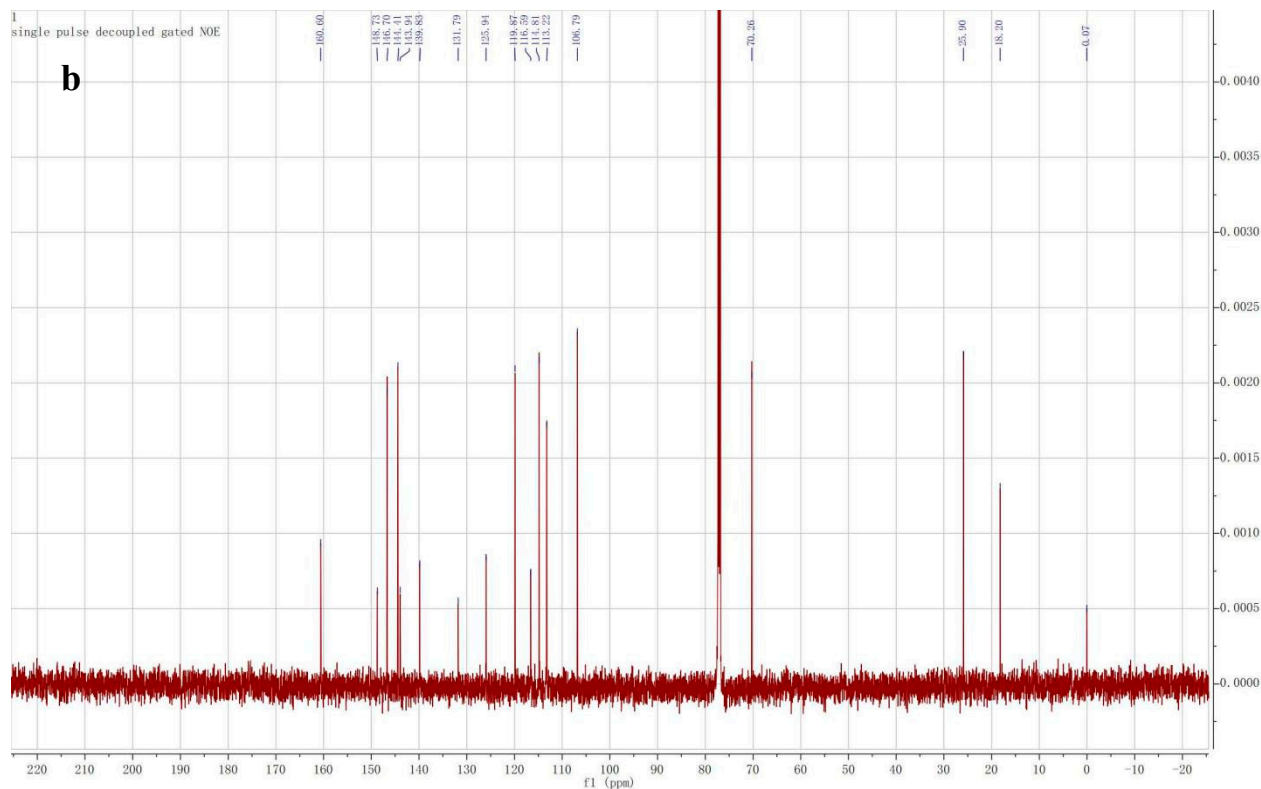

**Figure S7**  $^1\text{H}$  NMR (**a**) and  $^{13}\text{C}$  NMR (**b**) spectra of the coumarin **7** (imperatorin)



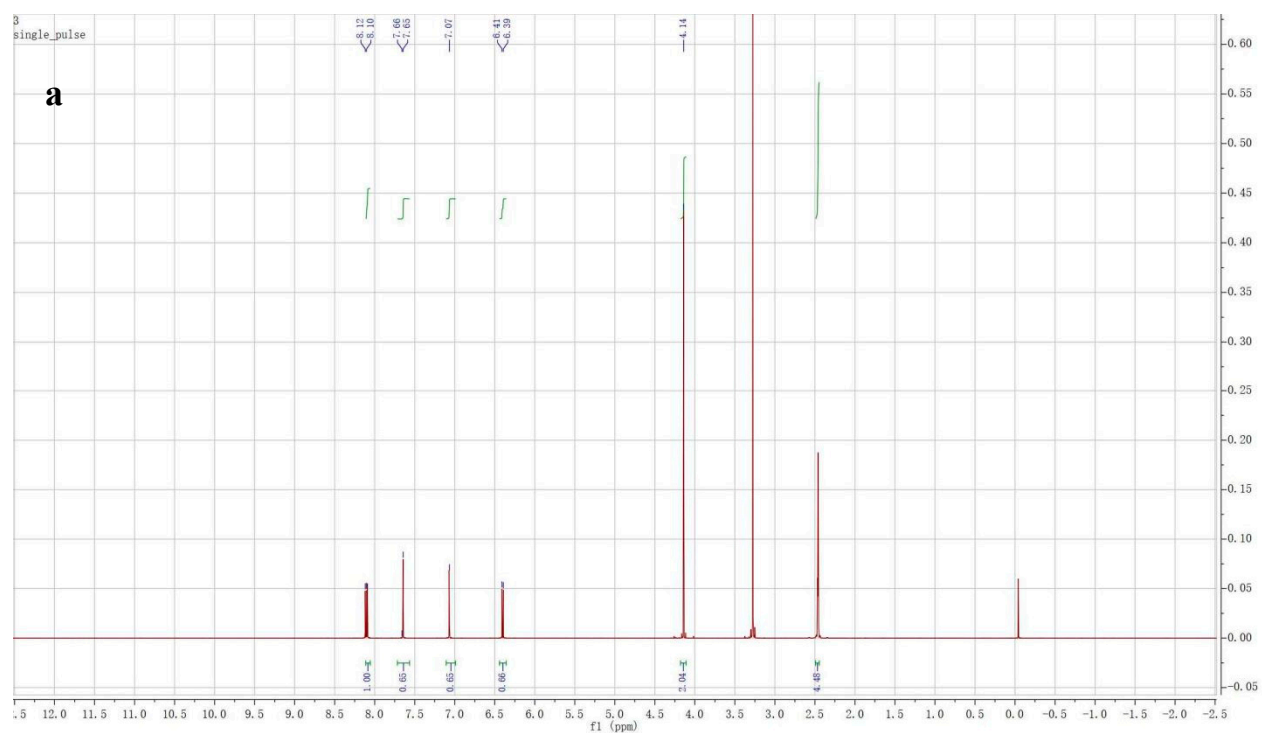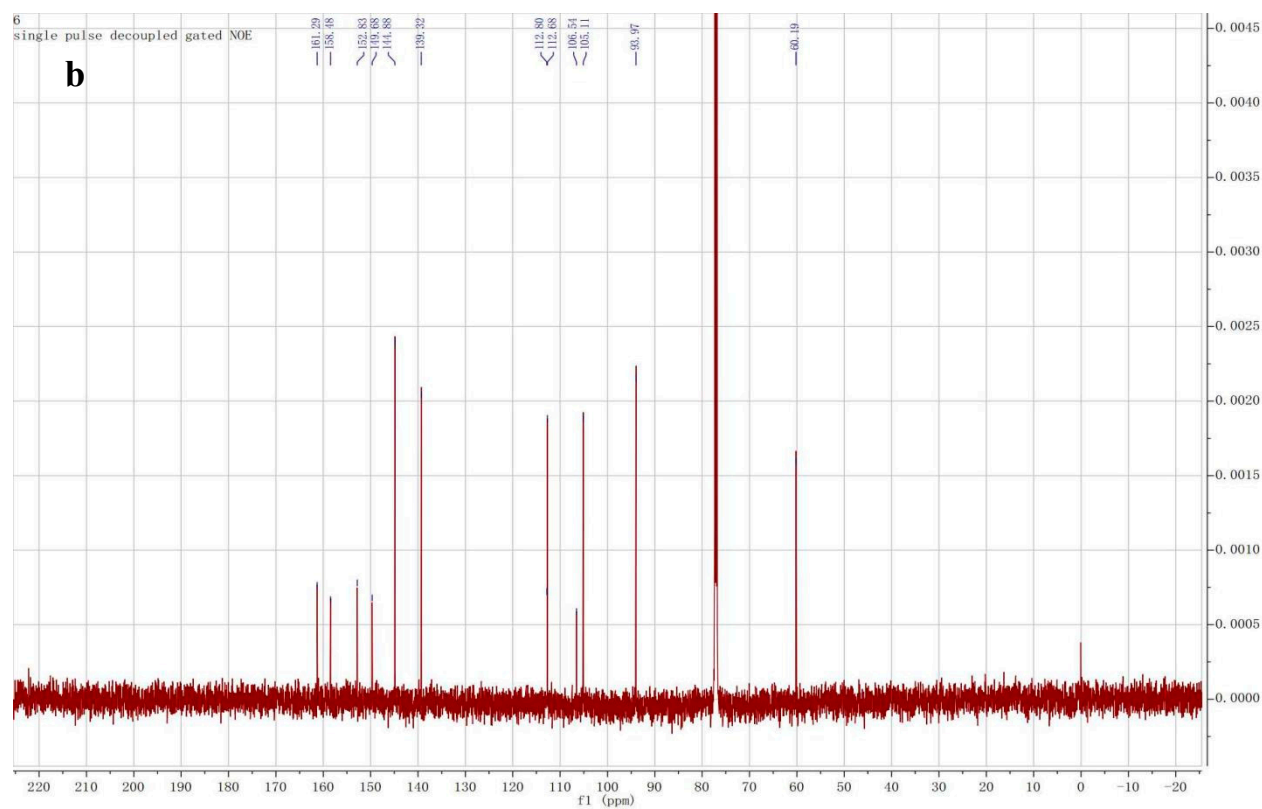

**Figure S8**  $^1\text{H}$  NMR (**a**) and  $^{13}\text{C}$  NMR (**b**) spectra of the coumarin **8** (bergapten)
